# Supplementary material for: Atherogenic index of plasma and coronary artery calcification progression beyond traditional risk factors according to baseline coronary artery calcium score
Source: PubMed Central journal article supplement (PMC7721801; doi:10.1038/s41598-020-78350-x), 2020-12-07
Supplement: 41598_2020_78350_MOESM1_ESM.pdf [file 41598_2020_78350_MOESM1_ESM.pdf]

# **Atherogenic index of plasma and coronary artery calcification progression beyond traditional risk factors according to baseline coronary artery calcium score**

Ki-Bum Won<sup>1,2</sup>, Donghee Han<sup>2,3</sup>, Ji Hyun Lee<sup>4</sup>, Su-Yeon Choi<sup>5</sup>, Eun Ju Chun<sup>6</sup>, Sung Hak Park<sup>7</sup>, Hae-Won Han<sup>8</sup>, Jidong Sung<sup>9</sup>, Hae Ok Jung<sup>10</sup>, Hyuk-Jae Chang<sup>2</sup>

## **Affiliations:**

<sup>1</sup>Division of Cardiology, Ulsan University Hospital, University of Ulsan College of Medicine, Ulsan, South Korea

<sup>2</sup>Division of Cardiology, Yonsei Cardiovascular Center, Yonsei University Health System, South Korea

<sup>3</sup>Division of Cardiology, New York-Presbyterian Hospital and Weill Cornell Medical College, New York, NY, USA

<sup>4</sup>Division of Cardiology, Myongji Hospital, Ilsan, South Korea

<sup>5</sup>Division of Cardiology, Healthcare System Gangnam Center, Seoul National University Hospital, Seoul, Korea

<sup>6</sup>Division of Radiology, Seoul National University Bundang Hospital, Seongnam, Korea

<sup>7</sup>Division of Radiology, Gangnam Heartscan Clinic, Seoul, Korea

<sup>8</sup>Department of Internal Medicine, Gangnam Heartscan Clinic, Seoul, Korea

<sup>9</sup>Division of Cardiology, Heart Stroke & Vascular Institute, Samsung Medical Center, Seoul, Korea

<sup>10</sup>Division of Cardiology, Seoul St. Mary's Hospital, College of Medicine, The Catholic University of Korea, Seoul, Korea

## **E-mail:**

Ki-Bum Won, E-mail: kbwon99@naver.com  
Donghee Han, E-mail: ibanezera@gmail.com  
Ji Hyun Lee, E-mail: jihyun.cardio@gmail.com  
Su-Yeon Choi, E-mail: sychoi9@gmail.com  
Eun Ju Chun, E-mail: drejchun@hanmail.net  
Sung Hak Park, E-mail: shparkmdmax@gmail.com  
Hae-Won Han, E-mail: drhanhae@gmail.com  
Jidong Sung, E-mail: jidong.sung@gmail.com  
Hae Ok Jung, E-mail: hojheart@catholic.ac.kr  
Hyuk-Jae Chang, E-mail: hjchang@yuhs.ac

**Running title:** AIP and CAC progression

**Conflicts of Interest:** The authors have no conflicts of interest to declare.

**Address for correspondence:**

Hyuk-Jae Chang, MD, PhD,  
Division of Cardiology, Severance Cardiovascular Hospital,  
Yonsei-Cedars-Sinai Integrative Cardiovascular Imaging Research Center,  
Yonsei University College of Medicine,  
Yonsei University Health System,  
50-1 Yonsei-ro, Seodaemun-gu, Seoul 03722, South Korea  
Tel.: +82(0)2 22288460; Fax: +82(0)2 3932041  
E-mail: hjchang@yuhs.ac

## FIGURE LEGENDS

**Figure 1.** Changes in CAC according to AIP quartile

(a) CAC progression; (b)  $\Delta\sqrt{\text{transformed CACS}}$  and annualized  $\Delta\sqrt{\text{transformed CACS}}$

*AIP* atherogenic index of plasma, *CAC* coronary artery calcification, *CACS* coronary artery calcification score

**Figure 2.** Changes in CAC according to AIP quartile and baseline CACS

(a) CAC progression; (b) annualized  $\Delta\sqrt{\text{transformed CACS}}$

*AIP* atherogenic index of plasma, *CAC* coronary artery calcification, *CACS* coronary artery calcium score

## SUPPLEMENTARY APPENDIX

### Supplementary Figure 1. Baseline CACS according to AIP quartiles

*AIP* atherogenic index of plasma, *CACS* coronary artery calcium score

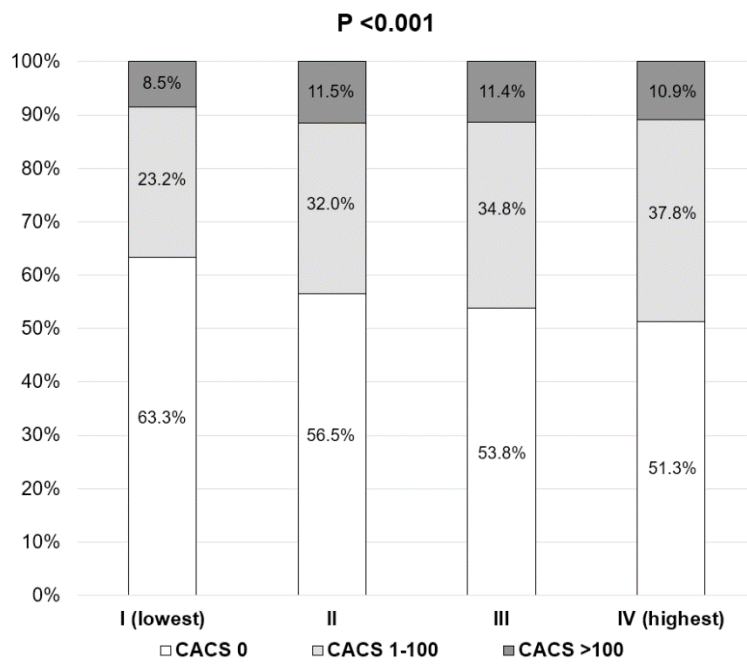

**Supplementary Table 1.** Clinical characteristics according to CAC progression

|                          | No CAC progression<br>(n = 8,557) | CAC progression<br>(n = 3,769) | P      |
|--------------------------|-----------------------------------|--------------------------------|--------|
| Age, years               | 50.2 ± 8.2                        | 55.0 ± 8.1                     | <0.001 |
| Male, n (%)              | 6,924 (80.9)                      | 3,458 (91.7)                   | <0.001 |
| Systolic BP, mmHg        | 118.9 ± 14.8                      | 121.1 ± 15.4                   | <0.001 |
| Diastolic BP, mmHg       | 74.8 ± 10.6                       | 75.7 ± 10.4                    | <0.001 |
| BMI, kg/m <sup>2</sup>   | 24.3 ± 2.8                        | 25.0 ± 2.7                     | <0.001 |
| Traditional risk factors |                                   |                                |        |
| Hypertension, n (%)      | 2,334 (28.3)                      | 1,682 (45.5)                   | <0.001 |
| Diabetes, n (%)          | 904 (10.6)                        | 799 (21.2)                     | <0.001 |
| Hyperlipidemia, n (%)    | 2,100 (24.5)                      | 1,355 (36.0)                   | <0.001 |
| Obesity, n (%)           | 3,319 (39.0)                      | 1,859 (49.4)                   | <0.001 |
| Current smoking, n (%)   | 2,195 (28.0)                      | 1,034 (29.7)                   | 0.054  |
| Laboratory               |                                   |                                |        |
| Total cholesterol, mg/dL | 197.1 ± 33.7                      | 198.3 ± 34.9                   | <0.001 |
| Triglyceride, mg/dL      | 136.0 ± 87.2                      | 154.6 ± 93.0                   | <0.001 |
| HDL-C, mg/dL             | 53.8 ± 16.4                       | 52.4 ± 14.9                    | <0.001 |
| LDL-C, mg/dL             | 120.5 ± 31.4                      | 125.2 ± 32.2                   | <0.001 |

|                        |               |               |        |
|------------------------|---------------|---------------|--------|
| Fasting glucose, mg/dL | 96.1 ± 18.6   | 101.6 ± 23.3  | <0.001 |
| HbA1C, %               | 5.6 ± 0.7     | 5.8 ± 0.8     | <0.001 |
| AIP                    | 0.355 ± 0.298 | 0.425 ± 0.284 | <0.001 |

---

Values are presented as the mean ± standard deviation or number (%).

*AIP* atherogenic index of plasma, *BMI* body mass index, *BP* blood pressure, *HbA1C* glycated hemoglobin A1C, *HDL-C* high-density lipoprotein cholesterol, *LDL-C* low-density lipoprotein cholesterol
